# Supplementary material for: The Gβ-like Protein AfCpcB Affects Sexual Development, Response to Oxidative Stress and Phagocytosis by Alveolar Macrophages in Aspergillus fumigatus
Source: MDPI journal article supplement (doi:10.3390/jof8010056), 2022-01-06
Supplement: s1 [file s1]

# Supplementary information

## **The G $\beta$ -like Protein *AfCpcB* is Required for Sexual Development, Response to Oxidative Stress and Phagocytosis by Alveolar Macrophages in *Aspergillus fumigatus***

Joo-Yeon Lim, Yeon-Ju Kim and Hee-Moon Park\*

Department of Microbiology and Molecular Biology,  
College of Bioscience and Biotechnology,  
Chungnam National University, Daejeon 34134, Korea

\* To whom correspondence should be addressed.

Hee-Moon Park, Tel: 042-821-7553/ Fax : 042-822-7367, E-mail: [hmpark@cnu.ac.kr](mailto:hmpark@cnu.ac.kr)

Supplementary Figure S1.

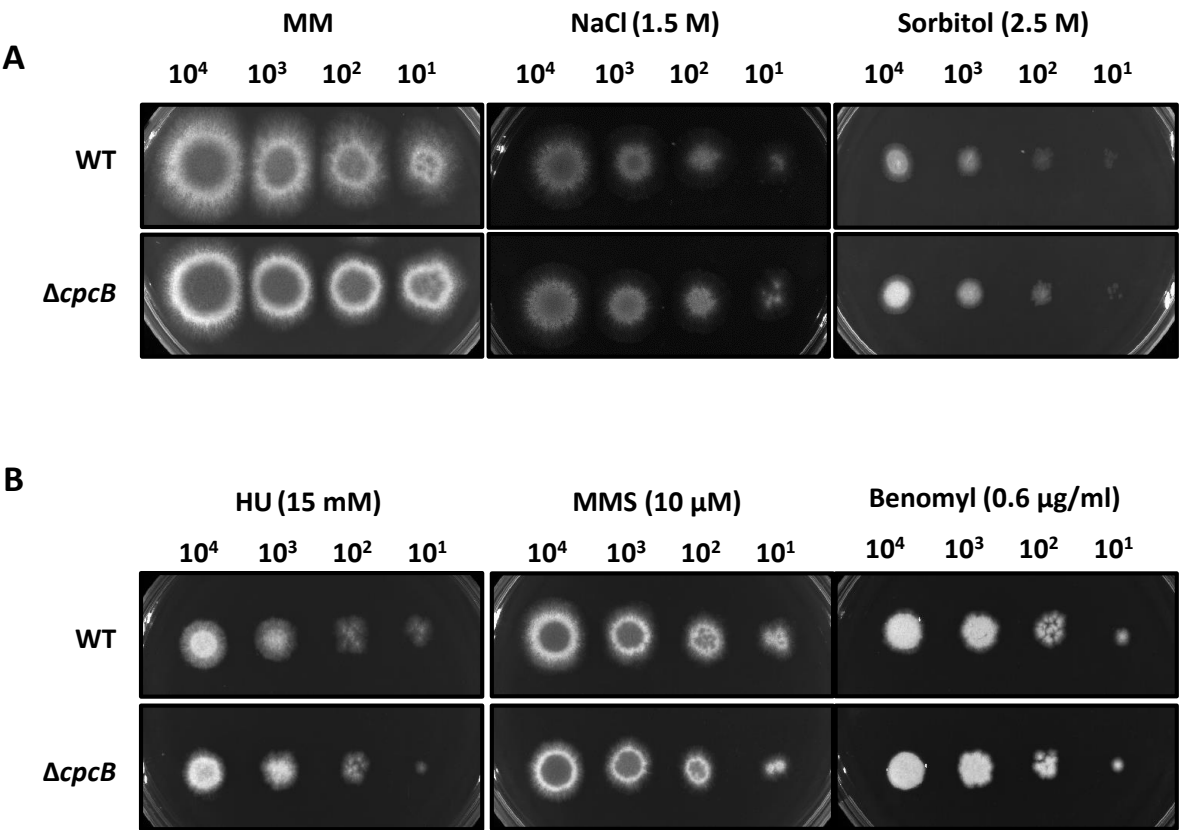

**Supplementary Figure S1. Effects of *AfcpcB* disruption on sensitivity to osmotic and DNA replicative stresses.** Conidia with 10-fold serial dilutions were spotted onto media and then, the plates were cultured at 37°C for 2 days. (A) Sensitivity of the strains to osmotic stresses (1.5 M NaCl and 2.5 M sorbitol). (B) Sensitivity of the strains to DNA replicative stresses (15 mM HU, 10 μM MMS and 0.6 μg/ml of benomyl). HU, hydroxyurea; MMS, methyl methanesulfonate.
